# Supplementary material for: A systematic review and network meta‐analysis of immunotherapy and targeted therapy for advanced melanoma
Source: PubMed Central journal article supplement (PMC5463084; doi:10.1002/cam4.1001), 2017-05-01
Supplement: CAM4-6-1143-s002.pdf [file CAM4-6-1143-s002.pdf]

|                               | Random sequence generation (selection bias) | Allocation concealment (selection bias) | Blinding of participants and personnel (performance bias) | Blinding of outcome assessment (detection bias) | Incomplete outcome data (attrition bias) | Selective reporting (reporting bias) | Other bias |
|-------------------------------|---------------------------------------------|-----------------------------------------|-----------------------------------------------------------|-------------------------------------------------|------------------------------------------|--------------------------------------|------------|
| Break-3 NCT01227889           | +                                           | +                                       | -                                                         | +                                               | +                                        | +                                    | +          |
| BRF113220 NCT01072175 1mg     | +                                           | +                                       | ?                                                         | ?                                               | +                                        | +                                    | ?          |
| BRF113220NCT01072175 2mg      | +                                           | +                                       | ?                                                         | ?                                               | +                                        | +                                    | +          |
| BRIM-3                        | +                                           | +                                       | -                                                         | ?                                               | +                                        | +                                    | +          |
| CheckMate 037                 | +                                           | +                                       | -                                                         | ?                                               | +                                        | +                                    | +          |
| CheckMate 066                 | +                                           | +                                       | +                                                         | +                                               | +                                        | +                                    | +          |
| Checkmate 067                 | +                                           | +                                       | +                                                         | +                                               | +                                        | +                                    | +          |
| Checkmate 067 ipi vs nivo     | +                                           | +                                       | +                                                         | +                                               | +                                        | +                                    | +          |
| checkmate 067 ipi vs nivo-ipi | +                                           | +                                       | +                                                         | +                                               | +                                        | +                                    | +          |
| Checkmate 069                 | +                                           | +                                       | +                                                         | +                                               | +                                        | +                                    | +          |
| Checkmate 069 BRAFmut         | +                                           | +                                       | +                                                         | +                                               | +                                        | +                                    | +          |
| Checkmate 069 BRAFwt          | +                                           | +                                       | +                                                         | +                                               | +                                        | +                                    | +          |
| coBRIM                        | +                                           | +                                       | +                                                         | +                                               | +                                        | +                                    | +          |
| COMBI-d                       | +                                           | +                                       | +                                                         | +                                               | +                                        | +                                    | +          |
| COMBI-v NCT01597908           | +                                           | +                                       | -                                                         | +                                               | +                                        | +                                    | +          |
| ipi-DTIC vs DTIC Robert 2011  | +                                           | +                                       | +                                                         | +                                               | +                                        | +                                    | -          |
| ipi-GMCSF                     | +                                           | +                                       | -                                                         | ?                                               | +                                        | +                                    | +          |
| Keynote 002 10mg              | +                                           | +                                       | -                                                         | ?                                               | +                                        | +                                    | ?          |
| Keynote 002 2mg               | +                                           | +                                       | -                                                         | ?                                               | +                                        | +                                    | ?          |
| Keynote 006 2wk               | +                                           | +                                       | -                                                         | ?                                               | +                                        | +                                    | +          |
| Keynote 006 3wk               | +                                           | +                                       | -                                                         | ?                                               | +                                        | +                                    | +          |
| METRIC NCT01245062            | +                                           | +                                       | -                                                         | ?                                               | +                                        | +                                    | +          |
| NCT00338130                   | +                                           | +                                       | -                                                         | ?                                               | +                                        | +                                    | +          |
| NCT00936221                   | +                                           | +                                       | +                                                         | +                                               | +                                        | +                                    | +          |
| NCT01134614                   | +                                           | +                                       | -                                                         | ?                                               | +                                        | +                                    | +          |
| Tremelimumab 2013             | +                                           | +                                       | -                                                         | -                                               | +                                        | +                                    | +          |
