# Supplementary material for: A systematic review and network meta‐analysis of immunotherapy and targeted therapy for advanced melanoma
Source: PubMed Central journal article supplement (PMC5463084; doi:10.1002/cam4.1001), 2017-05-01

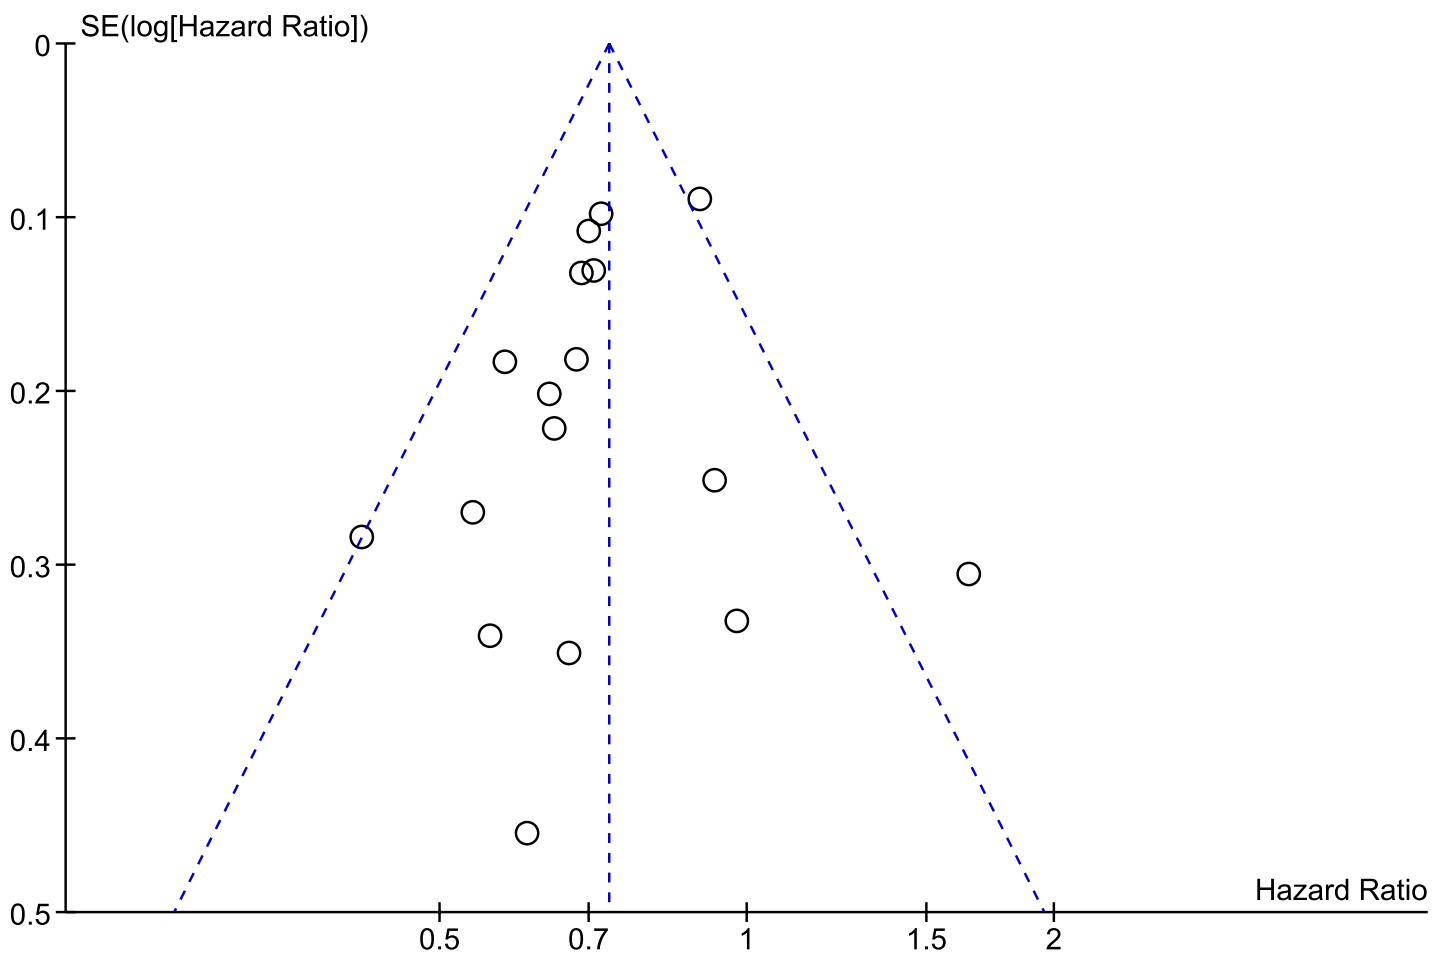

Supplement: CAM4-6-1143-s003.pdf [file CAM4-6-1143-s003.pdf]
